# Supplementary material for: The Effect of Resistance Training on Bone Mineral Density in Older Adults: A Systematic Review and Meta-Analysis
Source: MDPI journal article supplement (doi:10.3390/healthcare10061129), 2022-06-17
Supplement: s1 [file s1]

**Supplementary file #3:** The scores of methodological quality for each study from PEDro scale

| Study                | PEDro ratings |   |   |   |   |   |    |    | Scores | Classification |
|----------------------|---------------|---|---|---|---|---|----|----|--------|----------------|
|                      | 1             | 2 | 3 | 4 | 8 | 9 | 10 | 11 |        |                |
| Marques et al. [32]  | 1             | 1 | 0 | 1 | 1 | 1 | 1  | 1  | 6      | Excellent      |
| Mosti. et al. [4]    | 00            | 1 | 0 | 1 | 1 | 1 | 1  | 1  | 6      | Excellent      |
| Bemben & Bemben [31] | 0             | 0 | 0 | 1 | 1 | 1 | 1  | 1  | 5      | Good           |
| Marques et al [11]   | 1             | 0 | 0 | 1 | 1 | 1 | 1  | 1  | 5      | Good           |
| Bemben et al [13]    | 0             | 0 | 0 | 1 | 1 | 1 | 1  | 1  | 5      | Good           |
| Whiteford et al [12] | 1             | 1 | 0 | 1 | 1 | 1 | 1  | 1  | 6      | Excellent      |
| Bocalini et al [16]  | 1             | 1 | 0 | 1 | 1 | 1 | 1  | 1  | 6      | Excellent      |
